# Supplementary material for: Assessment of Individualized Mean Perfusion Pressure Targets for the Prevention of Cardiac Surgery-Associated Acute Kidney Injury—The PrevHemAKI Randomized Controlled Trial
Source: MDPI journal article supplement (doi:10.3390/jcm12247746), 2023-12-18
Supplement: s1 [file s1]

Supplementary Table S1. Variables associated with CSA-AKI

|                                                | No AKI patients    | AKI patients         | P value |
|------------------------------------------------|--------------------|----------------------|---------|
| <b>Baseline characteristics</b>                |                    |                      |         |
| Median Creatinine (IQR), mg/dL                 | 1.21 [ 0.99- 1.45] | 1.36 [ 1.22- 1.48]   | 0.009   |
| Diabetes mellitus, n (%)                       | 43 ( 69.35%)       | 17 ( 47.22%)         | 0.034   |
| <b>Surgical variables</b>                      |                    |                      |         |
| % cardiac index <2.2L/min/m <sup>2</sup> (IQR) | 8.73 (1.9-27)      | 18.9 (8-43.8)        | 0.046   |
| ECC time (IQR), min                            | 98.5 [ 76- 122]    | 128.5 [ 92.5- 147.5] | 0.003   |
| Surgical time (IQR), hours                     | 4.65 [ 3.93-5.18]  | 4.94 [ 4.57-5.94]    | 0.003   |
| Transfusion need, n (%)                        | 22 (35.5)          | 18 (50)              | 0.02    |
| Dobutamine after ECC, n, (%)                   | 27 (43.55)         | 24 (66.67)           | 0.036   |
| <b>First 24h</b>                               |                    |                      |         |
| Transfusion need, n (%)                        | 9 ( 14.52%)        | 13 ( 36.11%)         | 0.022   |
| %Time MAP <65 mmHg (IQR)                       | 3.6 [ 1- 9.10]     | 9 [ 1.15-21.07]      | 0.022   |

ECC: extracorporeal circulation; MAP: mean arterial pressure
